# Supplementary material for: Identification of HIV-reservoir cells with reduced susceptibility to antibody-dependent immune response
Source: eLife. 2022 May 26;11:e78294. doi: 10.7554/eLife.78294 (PMC9177146; doi:10.7554/eLife.78294)
Supplement: Figure 1—source data 1. [file elife-78294-fig1-data1.xlsx]

## Sheet: Fig1-A
% ADCC NK-mediated killing of different subsets
TNA	TSCM	TCM	TEM	TCD32dim	TCD20dim
38.083	42.2063	40.8594	33.4209	0	37.3433
31.3851	30.2563	52.4221	32.688	34.0262	74.5676
43.9069	0	54.3818	20.8068	0	40.1216
37.1667	27.722	44.1303	36.8223	0	0
29.1058	47.7445	46.1093	19.746	17.8092	41.916
39.3635	30.2833	47.7858	35.388	0	0
5.77697	0	18.5645	36.2043	0	19.2481
40.8233	52.0109	55.7035	52.3362	42.5065	64.5481
36.9012	0	49.3175	51.361	0	59.4723
46.3278	0	50.1584	58.7047	0	27.3527
12.882	19.9259	42.3677	56.4372	0	30.4956
33.8115	45.3072	53.0934	59.7204	17.1193	70.3747
48.7707	66.1316	58.4596	51.5584	17.0929	58.7805
37.3229	75	49.1929	57.6193	8.23529	53.1655
35.6265	0	50.4535	59.5318	0	47.2012

## Sheet: Fig1-B
% ADCC against total CD4 T (gp120-coated) mediated by NK cells from EC, ART-suppressed and HD
EC	ART	HD
33.8326	31.5574	66.0839
56.2746	39.6269	38.0454
68.9301	38.1435	63.8916
36.4239	37.9085	57.6156
39.3801	27.8765	54.3669
78.1363	40.8964	45.3294
44.8325	15.1266	73.43
	44.2358	82.6271
	41.1848
	47.8213
	31.6419
	45.4939
	51.3668
	46.6469
	40.7363

## Sheet: Fig1-C
% ADCC against different CD4 T subsets mediated by NK cells from EC, ART-suppressed and HD
NA (EC)	NA (ART)	SCM (EC)	SCM (ART)	CM (EC)	CM (ART)	EM (EC)	EM (ART)	CD32 (EC)	CD32 (ART)	CD20 (EC)	CD20 (ART)	NA (HD)	SCM (HD)	CM (HD)	EM (HD)	CD32 (HD)	CD20 (HD)
17.3475	38.083	33.4405	42.2063	44.6793	40.8594	29.1326	33.4209	34.2697	0	61.6864	37.3433	62.2707	58.9597	73.0321	70.4054	67.1043	87.8054
58.5782	31.3851	62.9426	30.2563	68.8553	52.4221	56.5171	32.688	23.7757	34.0262	74.8206	74.5676	25.7455	38.9179	39.0251	48.4019	25.8833	57.1816
70.8329	43.9069	0	0	75.3595	54.3818	72.1586	20.8068	62.6984	0	83.8594	40.1216	59.3516	56.5981	66.6864	74.2363	56.9185	84.7239
28.2598	37.1667	76.3933	27.722	48.035	44.1303	44.4121	36.8223	34.8426	0	55.6215	0	56.0601	50.0934	63.2156	59.7639	33.0963	62.2124
33.6479	29.1058	0	47.7445	48.0371	46.1093	52.0433	19.746	0	17.8092	57.2443	41.916	52.4872	43.5232	59.3931	63.3609	31.722	62.5924
73.9848	39.3635	83.5656	30.2833	85.3104	47.7858	82.0199	35.388	61.2806	0	72.2381	0	41.5174	51.7533	57.1904	32.7659	29.426	56.7116
29.9913	5.77697	30.0631	0	50.6179	18.5645	51.8978	36.2043	36.3495	0	72.5982	19.2481	64.9073	81.0388	80.1782	78.2298	67.5471	89.0108
	40.8233		52.0109		55.7035		52.3362		42.5065		64.5481	83.0897	85.5737	87.0498	80.1571	58.5531	72.5557
	36.9012		0		49.3175		51.361		0		59.4723
	46.3278		0		50.1584		58.7047		0		27.3527
	12.882		19.9259		42.3677		56.4372		0		30.4956
	33.8115		45.3072		53.0934		59.7204		17.1193		70.3747
	48.7707		66.1316		58.4596		51.5584		17.0929		58.7805
	37.3229		75		49.1929		57.6193		8.23529		53.1655
	35.6265		0		50.4535		59.5318		0		47.2012

## Sheet: Fig1-D
HIV-DNA (molec/Milion CD4 T)	% ADCC
432.107	33.8326
43.5306	56.2746
63.3238	68.9301
4.58095	36.4239
374.306	39.3801
348.9	44.8325
435.929	31.5574
4864.4	39.6269
5521.07	38.1435
1735.79	37.9085
5869.98	27.8765
1358.62	40.8964
143.633	15.1266
96.5382	44.2358
1043.66	41.1848
1352.27	47.8213
4431.94	31.6419
23.4091	45.4939
272.816	51.3668
182.21	46.6469
1402.33	40.7363

## Sheet: Fig1-E
HIV-DNA (molec/Milion CD4 T)	% ADCC CD32
432.107	34.2697
43.5306	23.7757
63.3238	62.6984
4.58095	34.8426
374.306	0
348.9	36.3495
435.929	0
4864.4	34.0262
5521.07	0
1735.79	0
5869.98	17.8092
1358.62	0
143.633	0
96.5382	42.5065
1043.66	0
1352.27	0
4431.94	0
23.4091	17.1193
272.816	17.0929
182.21	8.23529
1402.33	0

## Sheet: Fig1-G
CD32dim	CD32-
9.43396	40
0	6.89655
0	20.8333
54.3077	39.4737
70	66.1111
0	0
29.3532	0
44.7028	36.1809
3.95833	12.8319
50.2146	17.3516
54.818	55.2966
33.5731	17.7546
22.0826	25.641
35.8434	38.4868

## Sheet: Fig1-H
CD32dim	CD32-
38.0952	40.7155
7.14286	35.4839
18.75	38.7755
33.1126	36.2145
22.2222	22.6601
51.3197	44.9982
0	29.0667
20.5607	34.5096
0	21.3273
8.16327	68.3909
5.76923	6.79522
39.4872	43.2255
4.83871	8.65134
35.3944	41.9435
