# Supplementary material for: Identification of HIV-reservoir cells with reduced susceptibility to antibody-dependent immune response
Source: eLife. 2022 May 26;11:e78294. doi: 10.7554/eLife.78294 (PMC9177146; doi:10.7554/eLife.78294)
Supplement: Figure 2—source data 1. [file elife-78294-fig2-data1.xlsx]

## Sheet: Fig2-A
ING (CD32+)	PMA+Iono (CD32+)	RMD (CD32+)	R10 (CD32+)	ING (CD32-)	PMA+Iono (CD32-)	RMD (CD32-)	R10 (CD32-)
0.074	0.071	0.048	0.0009	0.012	0.013	0.00886	0.0009
0.084	0.034	0.097	0.012	0.021	0.014	0.014	0.00857
0.034	0.046	0.062	0.012	0.00886	0.00725	0.00955	0.00513
0.27	0.5	0.47	0.15	0.00638	0.011	0.017	0.00923
0.027	0.12	0.1	0.023	0.00857	0.027	0.016	0.00456
0.021	0.029	0.056	0.048	0.012	0.011	0.00651	0.0009
0.02	0.011	0.068	0.0009	0.00345	0.00306	0.00811	0.00264
0.056	0.018	0.0009	0.036	0.00709	0.00615	0.0044	0.00236
0.2	0.0009	0.17	0.052	0.052	0.017	0.026	0.00781

## Sheet: Fig2-B
ART	ART+LRA
59	860
30	710
0	120
30	180
40	63
42	120
48	1000
53	670
57	2700
50	12500
50	510
43	490
0	930
52	210
48	95.8
150	210
44.6	2000

## Sheet: Fig2-C
CD32dim	CD32-
4.55	0.067
0.012	0.017
0.69	0.068
0.084	0.00618
3.9	0.0096
3.23	0.00207
0.59	0.11
3.33	0.066
1.79	0.28
11.6	1.21
3.23	0.024
0.46	0.057
3.92	0.056
0.93	0.017
0.16	0.00376
2.5	0.02
0.89	0.2

## Sheet: Fig2-D
ART+LRA+NK	ART+LRA+NK+Plasma
21	14
4200	3100
30	84
57	83
1200	560
28	0
270	120
240	180
840	840
1900	1600
2900	2100
200	270
990	690
420	210
230	190
190	140
820	820

## Sheet: Fig2-E
ART+LRA+NK	ART+LRA+NK+Plasma
0	55.5556
0	25
0	0
0	15.7895
0	27.5862
0	0
0	30.303
0	50
0	17.3913
0	26.3158
0	0

## Sheet: Fig2-F
ART	ART+LRA
0	8.82
0	4
0	4.75
0	25
0	13.6
0	37.5
0	3.7
0	6.25
0	1.24
0	3.57
0	45.7
0	3.7
0	41.7
16.7	17.9
0	54.5
0	5.88
0	1.93

## Sheet: Fig2-G
ART+LRA+NK	ART+LRA+NK+Plasma
0	100
3.54	8.19
25	25
14.3	14.3
8.15	10.2
0	0
10.3	25
40	33.3
1.22	1.3
5	8.33
8.14	22.6
33.3	33.3
13.3	16.7
28.6	40
28	47.6
10.5	25
5.45	1.87

## Sheet: Fig2-H
total p24+	CD32dim
31.14	0
24.4	0
0	0
0	0
100	100
53.34	0
0	0
25	16.75
55.56	0
15.8	0
27.59	0
0	0
30.31	0
50	0
17.4	0
26.32	0
0	0
