# Supplementary material for: Identification of HIV-reservoir cells with reduced susceptibility to antibody-dependent immune response
Source: eLife. 2022 May 26;11:e78294. doi: 10.7554/eLife.78294 (PMC9177146; doi:10.7554/eLife.78294)
Supplement: Figure 3—source data 1. [file elife-78294-fig3-data1.xlsx]

## Sheet: Fig3-A
% MIC A/B (p24+)	% ULBP1 (p24+)	% CD155 (p24+)	% MIC A/B (p24-)	% ULBP1 (p24-)	% CD155 (p24-)
0.19	0.074	0.44	0.055	0.071	0.17
0.44	0.15	3.14	0.064	0.036	2.24
0.13	0.6	0.17	0.00942	0.94	0.067
0.058	0.058	0.058	0.046	0.018	0.055
0.33	0.15	0.26	0.27	0.11	0.35
0.059	0.02	0.044	0.036	0.017	0.035
0.6	0.019	0.88	0.04	0.000235	0.057
0.3	0.017	0.41	0.00904	0.00329	0.043
4.34	0.18	6.15	0.054	0.035	0.056
4.85	3.64	7.27	0.14	2.67	0.14
0.032	0.018	0.041	0.036	0.018	0.018
0.3	NA	0.21	0.44	NA	0.18
0.31	0.078	0.43	0.087	0.058	0.15
0.036	0.043	0.08	0.02	0.058	0.058
0.3	3.9	0.26	0.26	3.68	0.25
0.26	0.53	0.29	0.16	0.4	0.25
0.27	0.64	0.33	0.36	0.58	0.26
0.26	2.78	0.14	0.42	2.45	0.13
0.82	1.34	0.38	0.89	1.22	0.28

## Sheet: Fig3-B
MIC A/B (p24+)	ULBP1 (p24+)	CD155 (p24+)	MIC A/B (p24-)	ULBP1 (p24-)	CD155 (p24-)
1137	3389	797	1266	2917	1136
1009	2986	740	925	3274	826
1093	2785	535	929	2721	587
1144	4855	401	911	3296	686
767	3373	443	743	3206	481
860	3877	573	654	3121	464
966	2863	544	591	3221	315
1001	2978	764	712	2678	348
966	3016	654	645	3080	388
1441	3735	952	693	3215	527
792	3225	647	740	3031	300
663	NA	340	810	NA	760
856	3195	614	683	2960	393
1121	3363	559	657	3241	306
1340	3238	1591	830	3251	767
731	3139	404	676	3194	300
714	3185	448	612	3206	430
652	3226	701	642	3267	789
606	3166	359	614	3168	360

## Sheet: Fig3-C
% HLA-E (p24+)	% HLA-E (p24-)
2.81	2.56
3.01	3.17
12	13.3
7.48	9.27
14.3	14.1
17.9	9.42
7.2	6.96
12	6.41
10.8	4.75
17.3	13.7
8.17	7.14
2.88	2.85
12.5	12.2
23.7	22.2
18.2	16.2
17.8	14.1
16.4	14
9.62	8.75
16.3	14.1

## Sheet: Fig3-D
HLA-E (p24+)	HLA-E (p24-)
2061	2026
2089	2018
2163	2145
2071	2044
2163	2103
2167	2048
2163	2013
2232	2030
2314	2020
2148	2088
2035	2033
2051	2021
2005	2086
2136	2138
2135	2119
2132	2111
2134	2143
2063	2050
2107	2093

## Sheet: Fig3-E
% MIC A/B (CD32dim)	% ULBP1 (CD32dim)	% CD155 (CD32dim)	% MIC A/B (CD32neg)	% ULBP1 (CD32neg)	% CD155 (CD32neg)
0	2.56	2.56	0.15	0.031	0.6
7.25	1.45	4.35	0.41	0.14	3.73
0	2.53	0	0.13	0.48	0.27
1.67	1.67	0	0.051	0.051	0.06
0	0	0.81	0.33	0.16	0.26
0.31	0	0	0.059	0.019	0.042
1.25	0	2.19	0.58	0.02	0.85
1.09	0	1.09	0.27	0.00909	0.39
0.25	0	0.25	0.025	0.02	0.04
2.17	NA	0	0.27	0.017	0.2
0	NA	NA	0.023	0.031	0.069
4	5.78	3.56	0.24	3.85	0.21
0.16	1.11	0	0.27	0.52	0.31
0.37	0.75	0.37	0.27	0.66	0.33
0.83	3.31	0	0.26	2.76	0.14
1	1.5	0.5	0.83	1.33	0.39

## Sheet: Fig3-F
MFI MIC A/B (CD32dim)	MFI ULBP1 (CD32dim)	MFI CD155 (CD32dim)	MIC A/B (CD32neg)	ULBP1 (CD32neg)	CD155 (CD32neg)
0	NA	454	1000	NA	517
4483	2718	NA	896	3069	NA
0	3227	0	1035	2849	386
593	NA	0	1261	NA	401
0	0	NA	743	3373	NA
588	0	0	868	3942	475
941	0	656	956	2863	529
1540	0	1814	944	2599	700
682	0	727	862	3225	637
1672	NA	NA	586	2975	286
0	NA	0	754	3104	375
8047	3366	20837	835	3239	844
568	3094	0	735	3146	404
7317	3237	8244	621	3183	372
647	3066	0	652	3231	701
573	3042	322	607	3167	360

## Sheet: Fig3-G
% HLA-E (CD32dim)	% HLA-E (CD32neg)
12.8	2.66
14.5	2.92
29.1	10.9
21.7	7.31
21	14.1
30.2	17.7
15.7	6.84
23.5	11.1
14.8	7.8
10.9	2.68
36	23.3
22.7	17.9
25.4	17.3
26.6	15.8
20.7	9.31
27.5	16

## Sheet: Fig3-H
HLA-E (CD32dim)	HLA-E (CD32neg)
2121	2063
2165	2085
2601	2179
2747	2060
2327	2162
2274	2166
2139	2162
2344	2225
2109	2029
2437	2040
2392	2130
2210	2131
2168	2131
2190	2126
2080	2061
2158	2103

## Sheet: Fig3-I
NC	ADCC	basal
0	0	0.019
0.012	0.00937	0.018
0.73	3.8	3.9
0.4	0.38	0.53
0.94	0.81	2.78
0.83	0.79	1.34
0.025	0.1	0.087
0.09	0.088	0.1

## Sheet: Fig3-J
NC	ADCC	basal
0.02	0.18	0.6
0.058	0.056	0.032
0.1	0.37	0.3
0.18	0.22	0.26
0.12	0.19	0.26
0.77	0.97	0.82
0.23	0.31	0.24
0.28	0.55	0.33

[truncated: 6 more sheets: Fig3-K, Fig3-L, Fig3-M, Fig3-N, Fig3-O, Fig3-P]
