# Supplementary material for: Identification of HIV-reservoir cells with reduced susceptibility to antibody-dependent immune response
Source: eLife. 2022 May 26;11:e78294. doi: 10.7554/eLife.78294 (PMC9177146; doi:10.7554/eLife.78294)
Supplement: Figure 4—source data 1. [file elife-78294-fig4-data1.xlsx]

## Sheet: Fig4-B
Medium	Plasma
100	83.54
100	87
100	84.74
100	73.11
100	96.04
100	97.34
100	93.55

## Sheet: Fig4-C
Medium	Plasma
100	90.62
100	100
100	88.76
100	72.85
100	100
100	99.16
100	98.39

## Sheet: Fig4-D
TCD32dim	TCD32neg
50	24.7
66.7	72.7
46.2	32.3
9.09	11.1
69.4	80.8
33.3	31
50	50.5
46	42
29.5	23
67.9	8.42
3.45	1.38
33.2	0.42
5.73	4.01
12.5	7.7

## Sheet: Fig4-E
Sorted TCD32dim	Sorted TCD32-
89.56	100
68.83	100
76.55	100
