# Supplementary material for: Identification of HIV-reservoir cells with reduced susceptibility to antibody-dependent immune response
Source: eLife. 2022 May 26;11:e78294. doi: 10.7554/eLife.78294 (PMC9177146; doi:10.7554/eLife.78294)
Supplement: Figure 5—source data 1. [file elife-78294-fig5-data1.xlsx]

## Sheet: Fig5-A
p24-	p24+
2.42	19.7
1.6	17.9
2.79	7.47
1.19	2.23
0.46	1.51
0.42	5.38
0.3	3.94
0.3	1.88
1.3	3.72
1.38	4.6
1.65	5.12
1.14	3.58
3.9	18.6
4.74	18
5.17	9.58
4.73	6.53
2.79	5.01

## Sheet: Fig5-B
CD32dim	CD32-
10	23.6
33.3	17.3
12.2	7.53
2.7	2.02
3.53	1.5
8.46	3.51
6.58	3.9
1.96	1.85
4.55	3.72
6.52	4.62
22.2	4.57
6.67	3.36
14.3	19.1
18.5	17.8
11.4	9.8
5.13	6.67
5.71	5.2

## Sheet: Fig5-C
Medium (p24+)	plasma HIV+ (p24+)	FcRs blocked (p24+)	Plasma HIV- (p24+)	Medium (p24-)	Plasma HIV+ (p24-)	FcRs blocked (p24-)	Plasma HIV- (p24-)
10	40	12.5	0	2.74	2.1	2.03	2.07
33.3	61.5	55.6	0	1.65	3.93	2.64	2.5
12.2	22.5	6.52	13.1	3.1	2.76	3.93	2.89
2.7	3.7	0	2.7	1.55	1.12	2.17	1.18
3.53	4.07	1.55	2.16	0.46	1.21	0.94	0.38
8.46	13.5	5.51	8.61	0.51	0.82	0.81	0.29
6.58	12.1	7.14	21.7	0.69	0.43	0.38	0.4
1.96	6.82	1.45	1.12	0.24	0.27	0.43	0.29

## Sheet: Fig5-D
Medium	Plasma HIV+	FcRs blocked	Plasma HIV-
23.6	18.3	17.9	10.3
17.3	26.6	27.2	4.65
7.53	7.63	8.04	6.99
2.02	1.77	5.26	2.74
1.5	2.8	1.34	1.12
3.51	3.63	4.26	4.74
3.9	3.6	4.32	3.29
1.85	3.51	2.39	1.32
