# Supplementary material for: Identification of HIV-reservoir cells with reduced susceptibility to antibody-dependent immune response
Source: eLife. 2022 May 26;11:e78294. doi: 10.7554/eLife.78294 (PMC9177146; doi:10.7554/eLife.78294)
Supplement: Figure 6—source data 1. [file elife-78294-fig6-data1.xlsx]

## Sheet: Fig6-A
CD3	CD3 (IL15)	CD3 (IFN-a)	CD32dim	CD32dim (IL15)	CD32dim(IFN-a)
37.3936	43.1123	NA	0	0	NA
53.1518	59.534	59.3212	0	0	0
55.1899	59.9012	59.5052	14.5323	0.304124	35.0082
69.6	74.6	NA	42.2	60.42	NA
50.3223	59.7708	65.1681	36.8084	31.4607	12.6587
55.9503	NA	57.6657	0	NA	14.0878
44.445	69.3764	47.7606	39.5833	27.5591	38.6598
