# Supplementary figures and images for: Identification of HIV-reservoir cells with reduced susceptibility to antibody-dependent immune response
Source: eLife journal article supplement (doi:10.7554/elife.78294), 2022-05-24

Figure 1—figure supplement 2

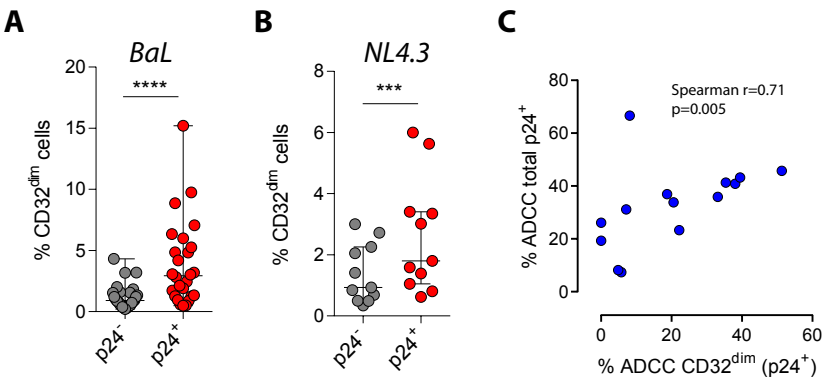

Supplement: supp [file elife-78294-supp-v1.zip]

Figure 1—figure supplement 1

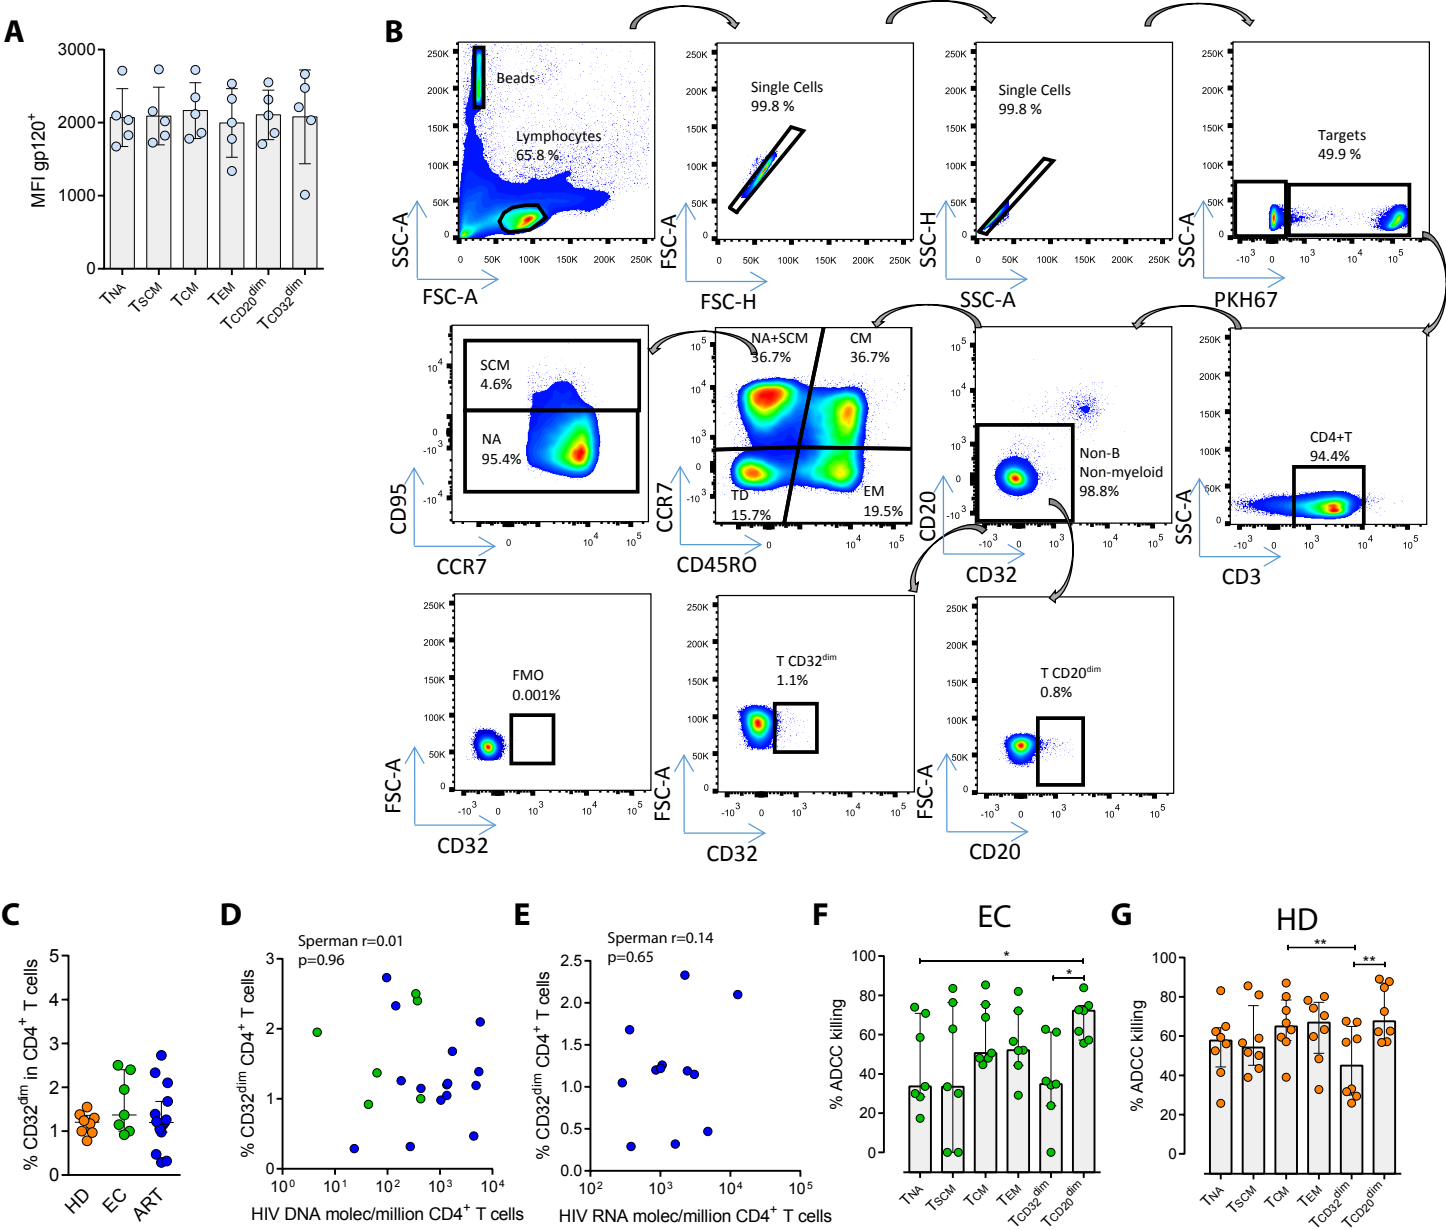

Supplement: supp [file elife-78294-supp-v1.zip]

Figure 4—figure supplement 1

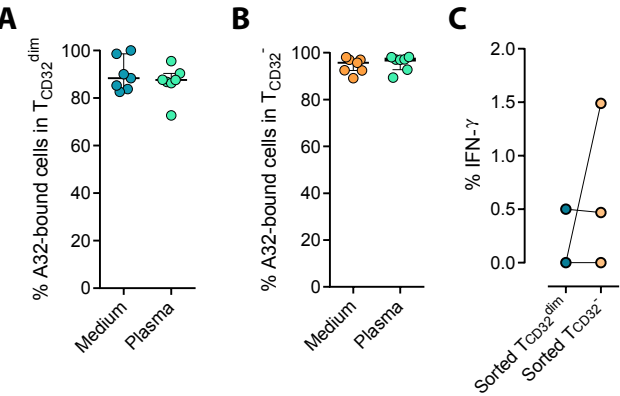

Supplement: supp [file elife-78294-supp-v1.zip]

Figure 3—figure supplement 1

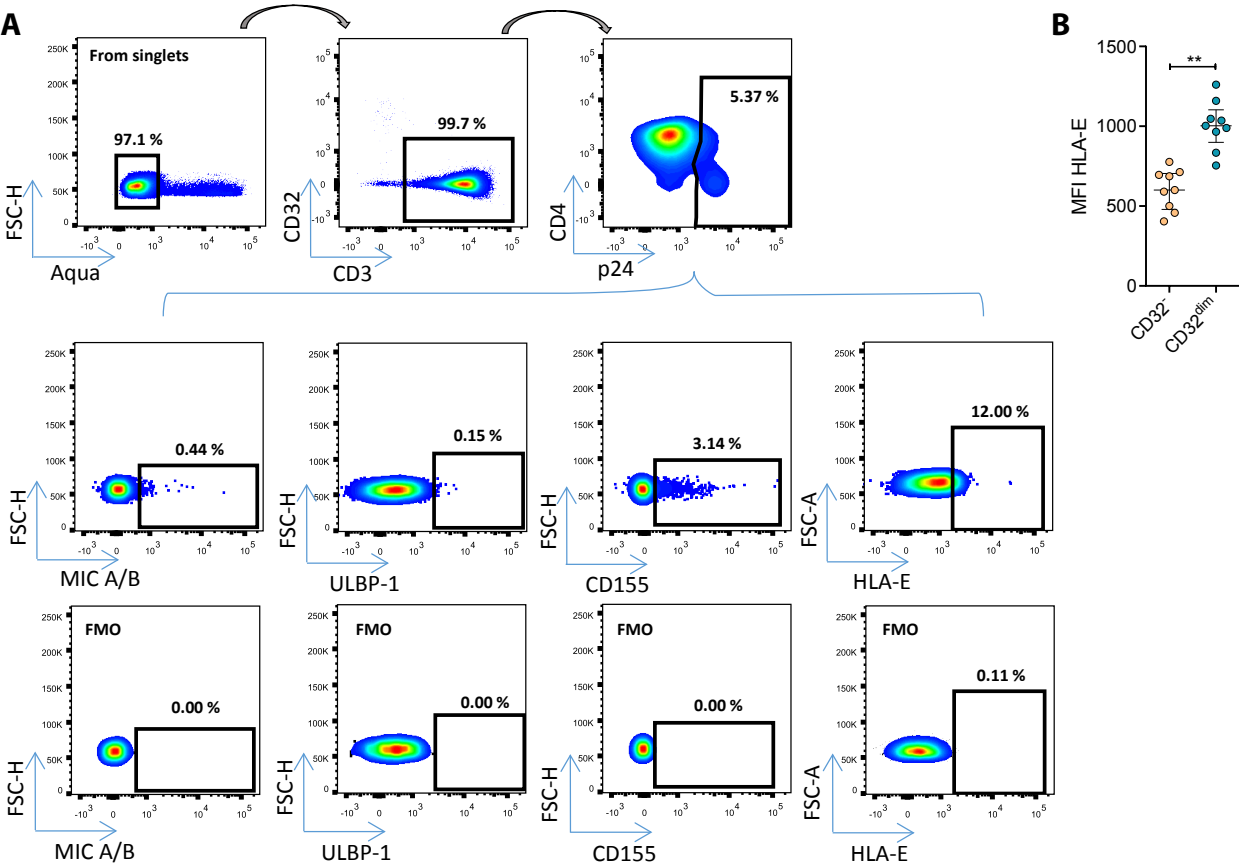

Supplement: supp [file elife-78294-supp-v1.zip]

Figure 2—figure supplement 1

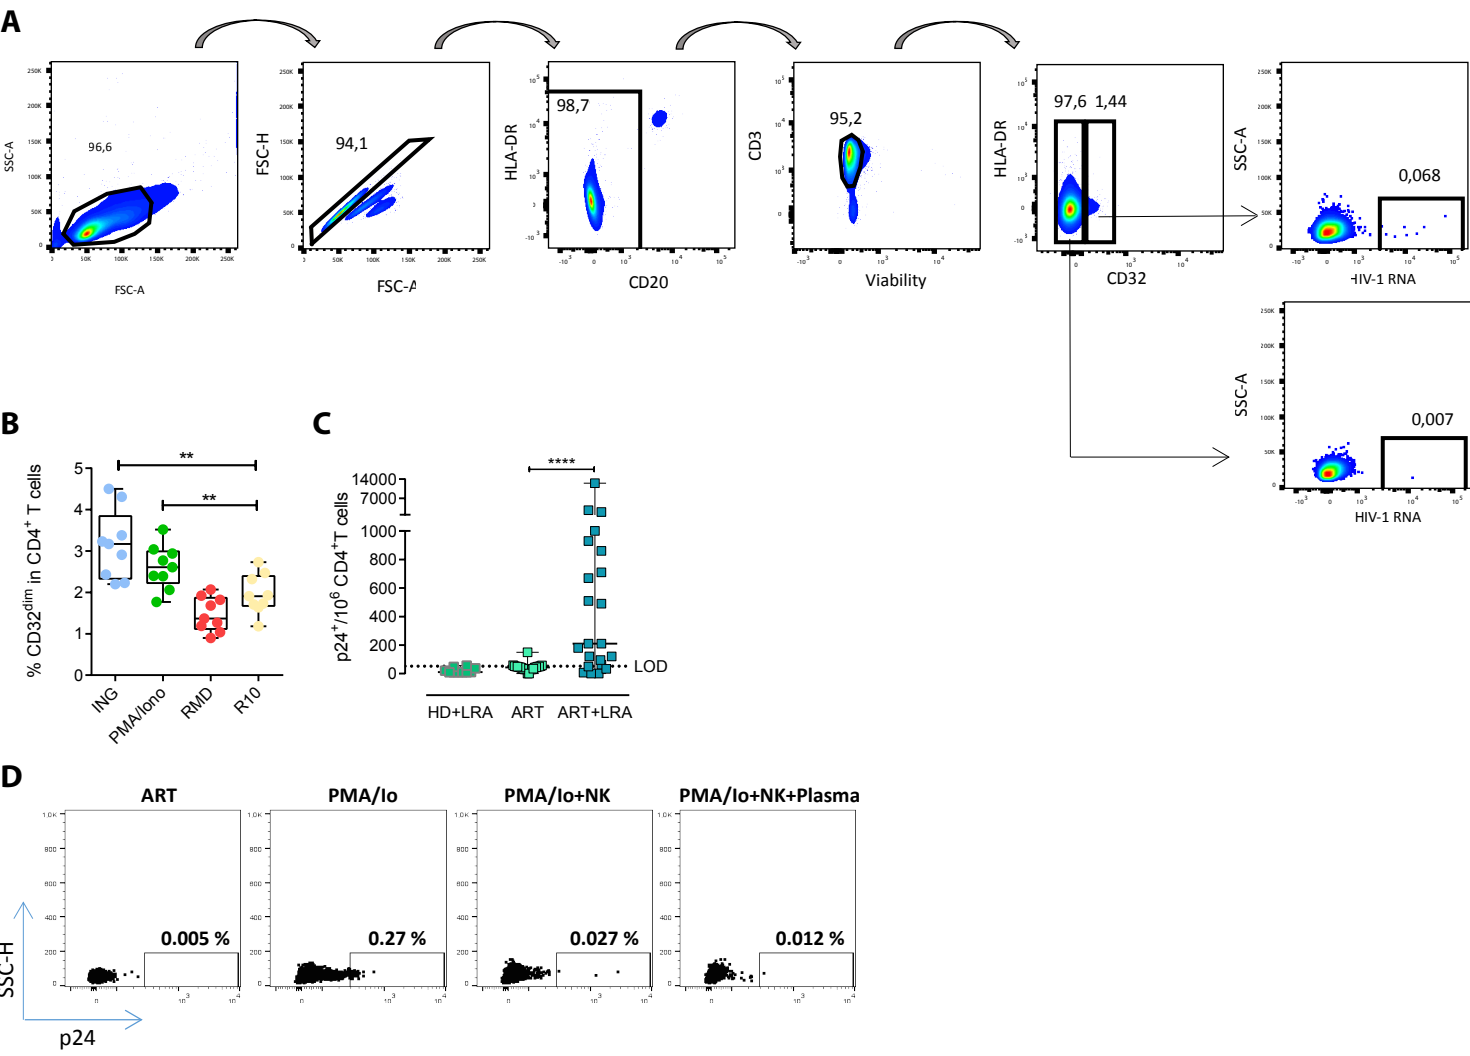

Supplement: supp [file elife-78294-supp-v1.zip]
